# Supplementary material for: Cecropin A Modulates Tight Junction-Related Protein Expression and Enhances the Barrier Function of Porcine Intestinal Epithelial Cells by Suppressing the MEK/ERK Pathway
Source: PubMed Central journal article supplement (PMC6073479; doi:10.3390/ijms19071941), 2018-07-02
Supplement: ijms-19-01941-s001.pdf [file ijms-19-01941-s001.pdf]

## Supplementary Materials:

# Cecropin A Modulates Tight Junction-Related Protein Expression and Enhances the Barrier Function of Porcine Intestinal Epithelial Cells by Suppressing the MEK/ERK Pathway

**Table S1.** The antibacterial ability of AMPs (MIC/MBC,  $\mu\text{g}/\text{mL}$ ).

|                            | BLP1    | Cecropin A | PMAP-23   | LL37      | PG-1        | PG-2      | RMAD-6  |
|----------------------------|---------|------------|-----------|-----------|-------------|-----------|---------|
| E coli ATCC 35150 ( O157 : |         |            |           |           |             |           |         |
| H7 )                       | 100/100 | 6.25/6.25  | 100/100   | 50/50     | 3.13/12.5   | 6.25/6.25 | ND      |
| E coli SSI 82000           | 100/100 | 1.5/1.5    | 12.5/25   | 12.5/12.5 | 3.13/6.25   | 6.25/12.5 | ND      |
| E coli ATCC 25922          | 50/50   | 1.5/1.5    | 6.25/6.25 | 6.25/6.25 | 6.25/6.25   | 6.25/6.25 | 25/50   |
| E.coli ATCC 35401          |         |            |           |           |             |           |         |
| (O78:11 )                  | 50/50   | 3.125/6.25 | 25/25     | 12.5/25   | 6.25/6.25   | 12.5/12.5 | 50/50   |
| E coli W25K                | 25/25   | 1.5/3.125  | 6.25/6.25 | 12.5/25   | 6.25/12.5   | 6.25/12.5 | 25/50   |
| Salmonella paratyphoid B   |         |            |           |           |             |           |         |
| CMCC 50094                 | 100/100 | 3.125/6.25 | ND        | 50/50     | 3.125/6.25  | 12.5/50   | ND      |
| Salmonella enteritidis     |         |            |           |           |             |           |         |
| ATCC 9120                  | 100/ND  | 1.5/1.5    | ND        | 50/50     | 3.125/6.25  | 12.5/25   | ND      |
| Pseudomonas aeruginosa     |         |            |           |           |             |           |         |
| ATCC 27853                 | 100/100 | 3.125/6.25 | 50/50     | 12.5/25   | 3.125/3.125 | 6.25/6.25 | 100/100 |

|                        |         |             |            |         |             |           |           |
|------------------------|---------|-------------|------------|---------|-------------|-----------|-----------|
| Pseudomonas aeruginosa |         |             |            |         |             |           |           |
| ATCC 9027              | 100/100 | 3.125/3.125 | 25/25      | 12.5/25 | 3.125/3.125 | 6.25/12.5 | 50/50     |
| Staphylococcus aureus  |         |             |            |         |             |           |           |
| 29213                  | 25/25   | 50/100      | 3.125/6.25 | 50/50   | 1.5/3.125   | 6.25/6.25 | 6.25/12.5 |

---

MIC: Minimum inhibitory concentration; MBC: minimum bactericidal concentration. The results were confirmed by three independent experiments per treatment (n=3). Representative results of the three independent experiments are shown.

**Table S2.** The AMPs selected from different animal sources.

| Name                              | Source  | Length | Charge | 3D structure    | Sequence                              |
|-----------------------------------|---------|--------|--------|-----------------|---------------------------------------|
| Bombinin-like peptide 1 ( BLP-1 ) | frog    | 28     | 3      | $\alpha$ -helix | GIGASILSAGKSALKGLAKGLAEHFAN           |
| Cecropin A                        | insect  | 37     | 7      | $\alpha$ -helix | KWKLFKKIEKVGQNIRDGIIKAGPAVAVVGQATQIAK |
| PMAP-23                           | pig     | 24     | 6      | $\alpha$ -helix | RIIDLLWRVRRPQKPKFVTWVWR               |
| LL37                              | human   | 37     | 6      | $\alpha$ -helix | LLGDFFRKSKEKIGKEFKRIVQRIKDFLRNLPRTES  |
| Protegrin-1                       | pig     | 18     | 7      | disulfide bond  | RGGRLCYCRRRFCVCGR                     |
| Protegrin-2                       | pig     | 16     | 6      | disulfide bond  | RGGRLCYCRRRFCICV                      |
| RMAD-6                            | mammals | 33     | 8      | disulfide bond  | RRTCRCRFGRCFRRESYSGSCNINGRISLCCR      |

Length: the number of amino acids; charge: the positive charge of the AMPs; 3D structure: the 3D structure of the AMPs; sequence: the amino acid sequence of AMPs.

**Table S3.** The primer of IL-6, IL-8 and TNF- $\alpha$  for qPCR.

|               | Forward                | Reverse              | Tm ( °C ) |
|---------------|------------------------|----------------------|-----------|
| IL-6 pig      | CAAAGCCACCACCCTAAC     | TCGTTCTGTGACTGCAGCTT | 60        |
| IL-8 pig      | TTCTTCTTTATCCCCAAACTGG | CCACATGTCTCAAGGTAGGA | 60        |
| TNF- $\alpha$ | CCAATGGCAGAGTGGGTATG   | TGAAGAGGACCTGGGAGTAG | 60        |

F: forward primer, R: reverse primer.

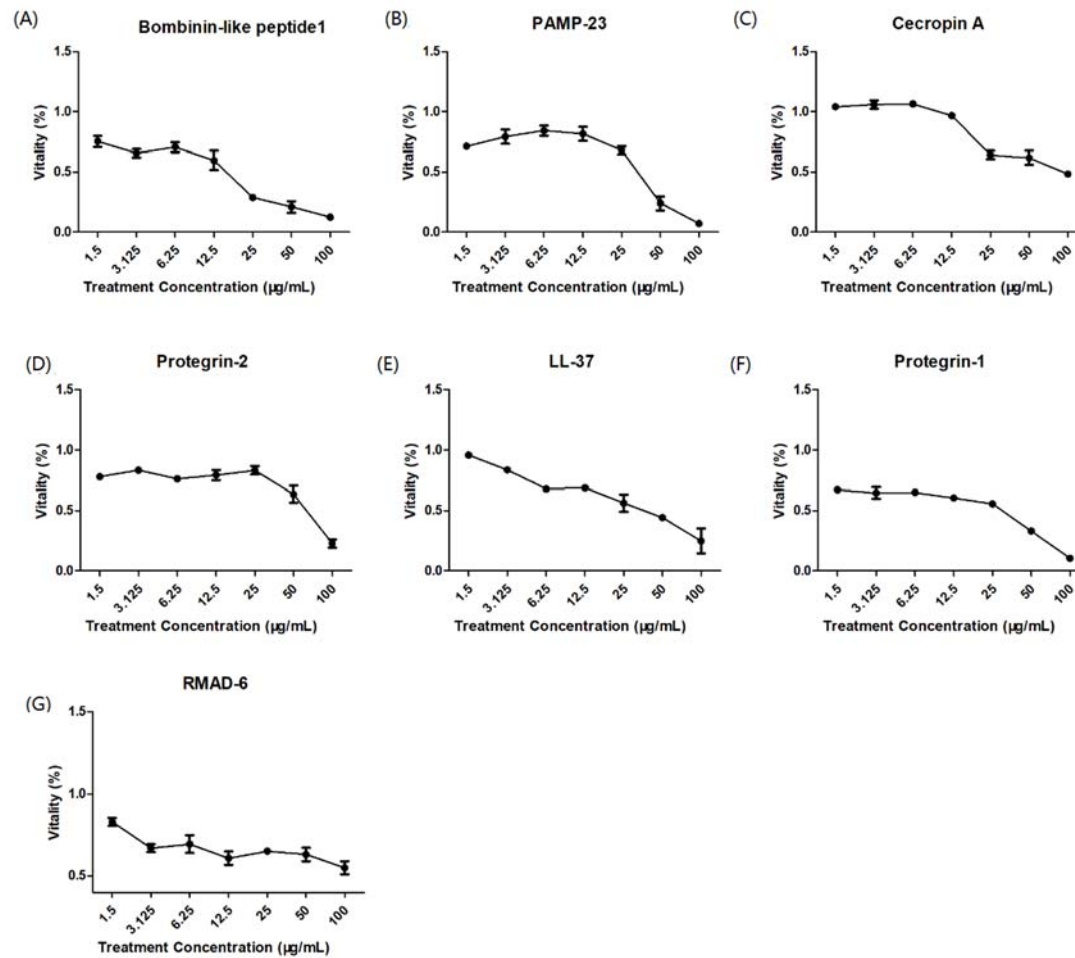

**Figure S1.** The effect of AMPs on IPEC-J2 cell vitality. The cell vitality was measured by using MTT assay after AMPs treated for 8h. The results were confirmed by three independent experiments per treatment ( $n = 6$  for each experiment).
